# Supplementary material for: ExoCET: exonuclease in vitro assembly combined with RecET recombination for highly efficient direct DNA cloning from complex genomes
Source: PubMed Central journal article supplement — Nucleic Acids Res. 2017 Dec 12;46(5):e28. doi: 10.1093/nar/gkx1249 (PMC5861427; doi:10.1093/nar/gkx1249), 2017-12-12
Supplement: gkx1249_supp.pdf [file gkx1249_supp.pdf]

## Supporting Information

### **ExoCET: Exonuclease *in vitro* assembly combined with RecET recombination for highly efficient direct DNA cloning from complex genomes**

Hailong Wang<sup>1</sup>, Zhen Li<sup>1</sup>, Ruonan Jia<sup>1</sup>, Jia Yin<sup>1</sup>, Aiyong Li<sup>1</sup>, Liqiu Xia<sup>3</sup>, Yulong Yin<sup>3</sup>, Rolf Müller<sup>1,4</sup>, Jun Fu<sup>1,\*</sup>, A. Francis Stewart<sup>2,\*</sup> & Youming Zhang<sup>1,\*</sup>

<sup>1</sup>Shandong University–Helmholtz Institute of Biotechnology, State Key Laboratory of Microbial Technology, School of Life Science, Shandong University, Shanda Nanlu 27, 250100 Jinan, People's Republic of China

<sup>2</sup>Genomics, Biotechnology Center, Technische Universität Dresden, Tatzberg 47-51, 01307 Dresden, Germany

<sup>3</sup>College of Life Science, Hunan Normal University, 410081 Changsha, People's Republic of China

<sup>4</sup>Department of Microbial Natural Products, Helmholtz-Institute for Pharmaceutical Research Saarland (HIPS), Helmholtz Centre for Infection Research (HZI) and Pharmaceutical Biotechnology, Saarland University, Campus C2 3, 66123 Saarbrücken, Germany

This file includes:

Supplementary Figures S1 to S9

Supplementary Note S1. The formula used to calculate the percentage of linear and circular products in the *in vitro* assembly reaction

Supplementary Table S1. Oligonucleotides for *in vitro* digestion of *S. albus* genomic DNA using Cas9-gRNA complexes

Supplementary Table S2. Oligonucleotides for amplification of p15A-cm linear vectors

Supplementary Table S3. Oligonucleotides used for ExoCET genotyping

Supplementary Table S4. Oligonucleotides used to amplify the *mVenus-PGK-neo* cassette

Supplementary Table S5. Sequence analysis of *Wnt4* alleles cloned from the mouse melanoma B16 cell

Supplementary Table S6. Titration of ExoCET genotyping experiment using Oct4-hVenus #7 (R1) cell line

Supplementary Table S7. Direct cloning of the 45kb segment containing the *Wnt4* gene from mouse genomic DNA using indicated methods

Supplementary Table S8. Summary of previous direct DNA cloning methods

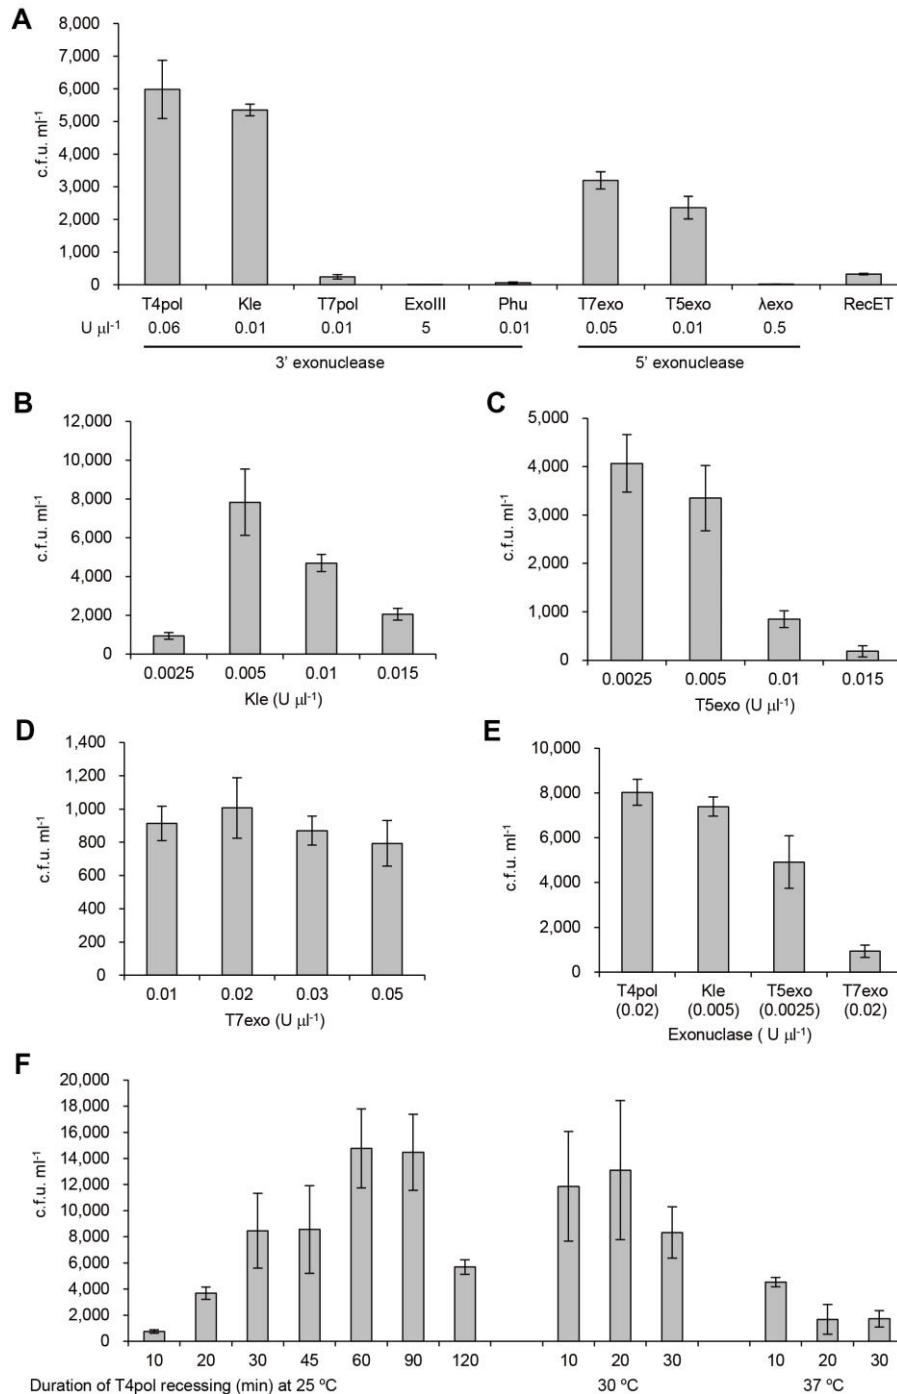

**Supplementary Figure S1. Tests of different exonucleases for direct cloning of the 14 kb *lux* gene cluster.** The p15A-cm vector and *P. phosphoreum* genomic DNA were treated with exonucleases before annealing and electroporation into arabinose induced *E. coli* GB05-dir. **(A)** Initial tests using the indicated exonucleases. **(B-D)** Optimization of the concentration of Kle, T5exo and T7exo. **(E)** Comparison of the cloning efficiency using the optimal amount of T4pol, Kle, T5exo and T7exo after 20 min of exonuclease digestion. **(F)** Optimization of the reprocessing temperature and duration of T4pol (0.02 U  $\mu\text{l}^{-1}$ ). Error bars, s.d.;  $n = 3$ .

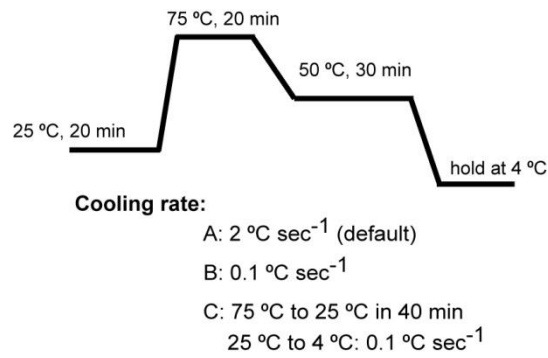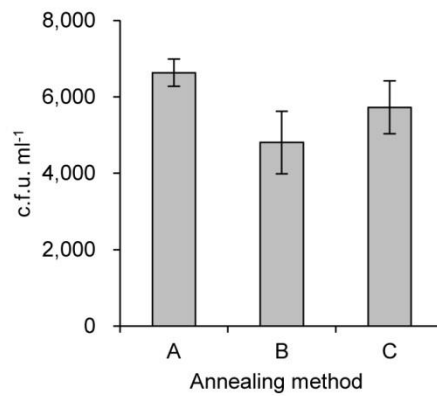

**Supplementary Figure S2. Effects of cooling rate for annealing on direct cloning of the 14 kb *lux* gene cluster.** Error bars, s.d.;  $n = 3$ . The p15A-cm vector and *P. phosphoreum* genomic DNA were treated with 0.02 U  $\mu\text{l}^{-1}$  T4pol and electroporated into arabinose induced *E. coli* GB05-dir after the different annealing protocols indicated as A, B or C.

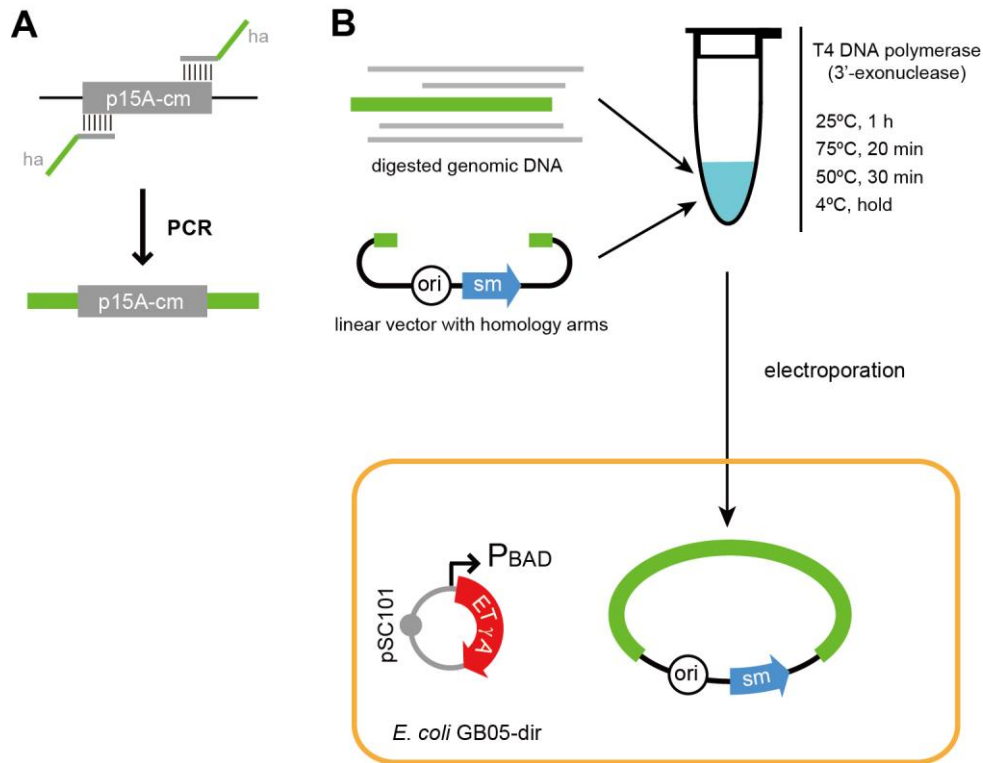

**Supplementary Figure S3. Preparation of linear cloning vectors. (A)** The p15A-cm vector was amplified by PCR using oligonucleotides including 80 nucleotides homology arms. **(B)** Standardized strategy for direct cloning from digested genomic DNA using ExoCET. The *in vitro* assembly products are electroporated into arabinose induced *E. coli* GB05-dir harboring pSC101-BAD-ETgA-tet. Correct recombinants are selected on LB plates containing appropriate antibiotics.

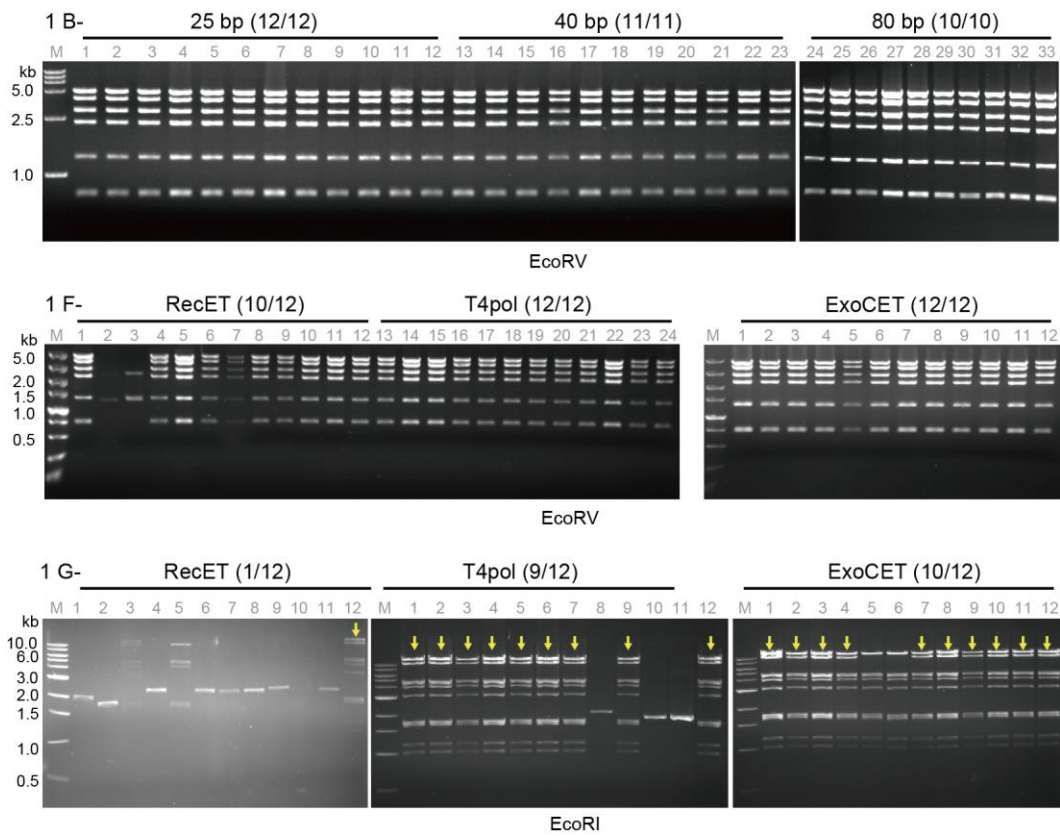

**Supplementary Figure S4. Restriction analysis of clones obtained in Figure 1.**

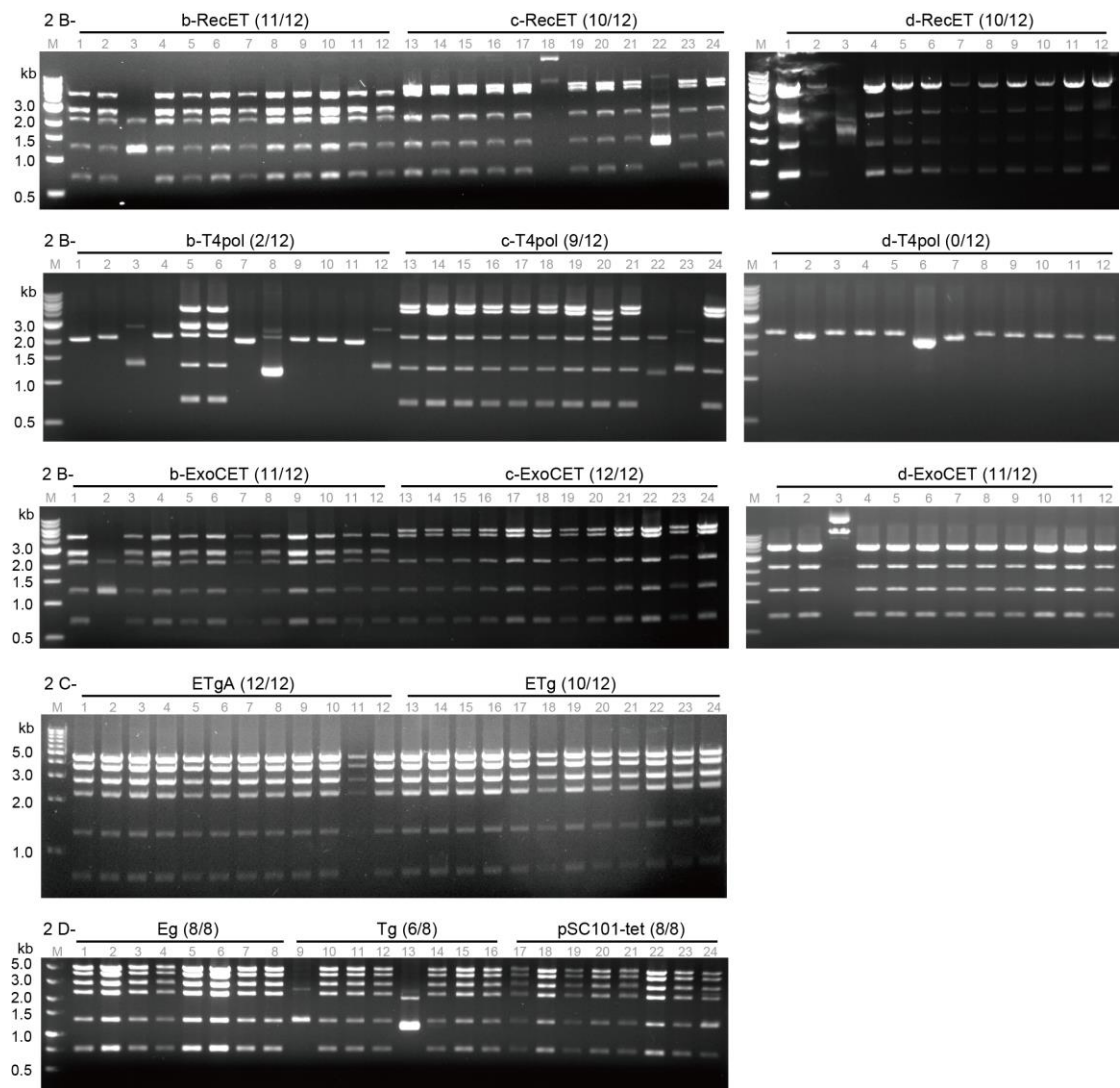

**Supplementary Figure S5. EcoRV restriction analysis of clones obtained in Figure 2.**

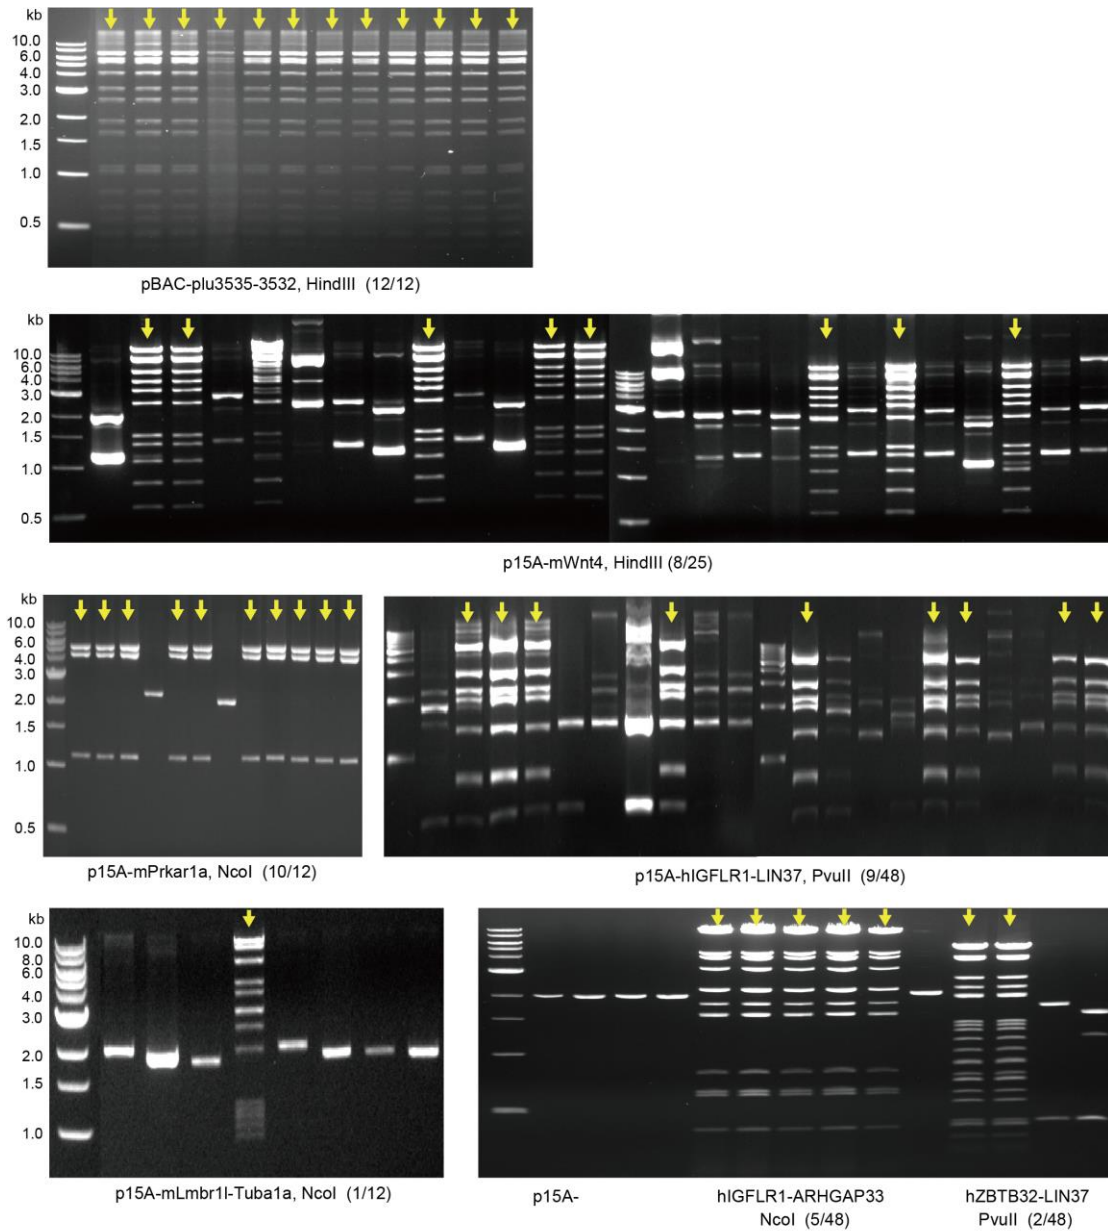

**Supplementary Figure S6. Restriction analysis of clones obtained in Table 1. Correct clones are indicated with arrows.**

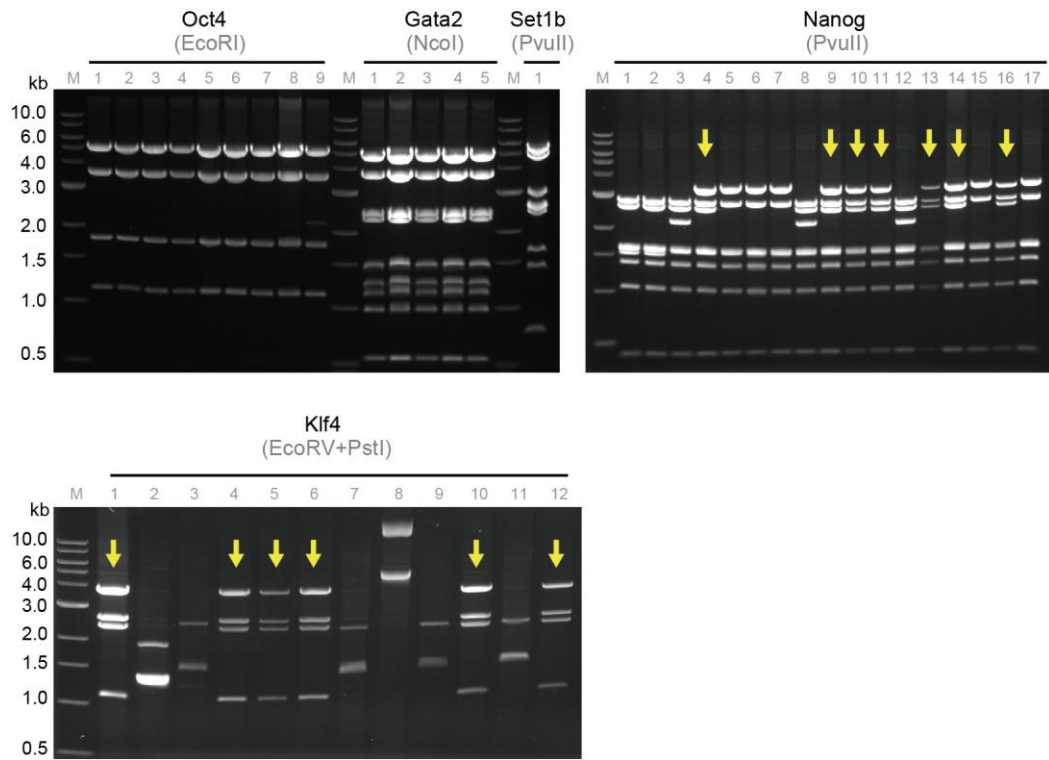

**Supplementary Figure S6 continued. Restriction analysis of obtained clones in Table 1.**

Correct clones are indicated with arrows (all Oct4 and Gata2 clones are correct).



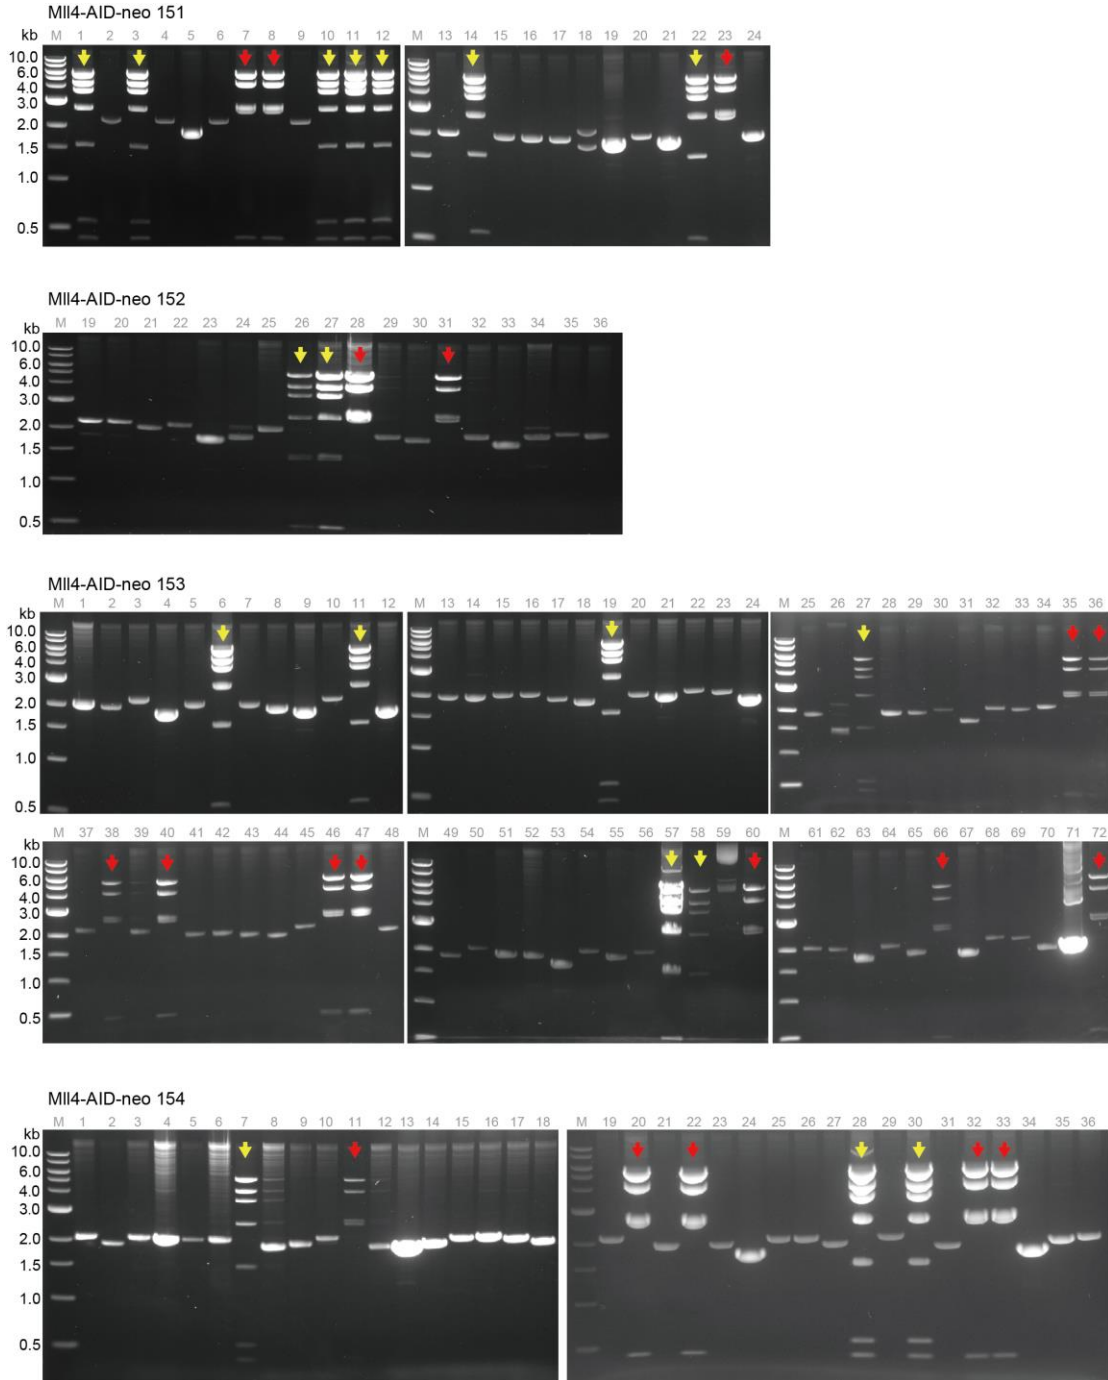

**Supplementary Figure S6 continued. NcoI restriction analysis of clones obtained in Table 1.** Clones containing targeted alleles are indicated with yellow arrows, and clones containing wild-type alleles are indicated with red arrows.

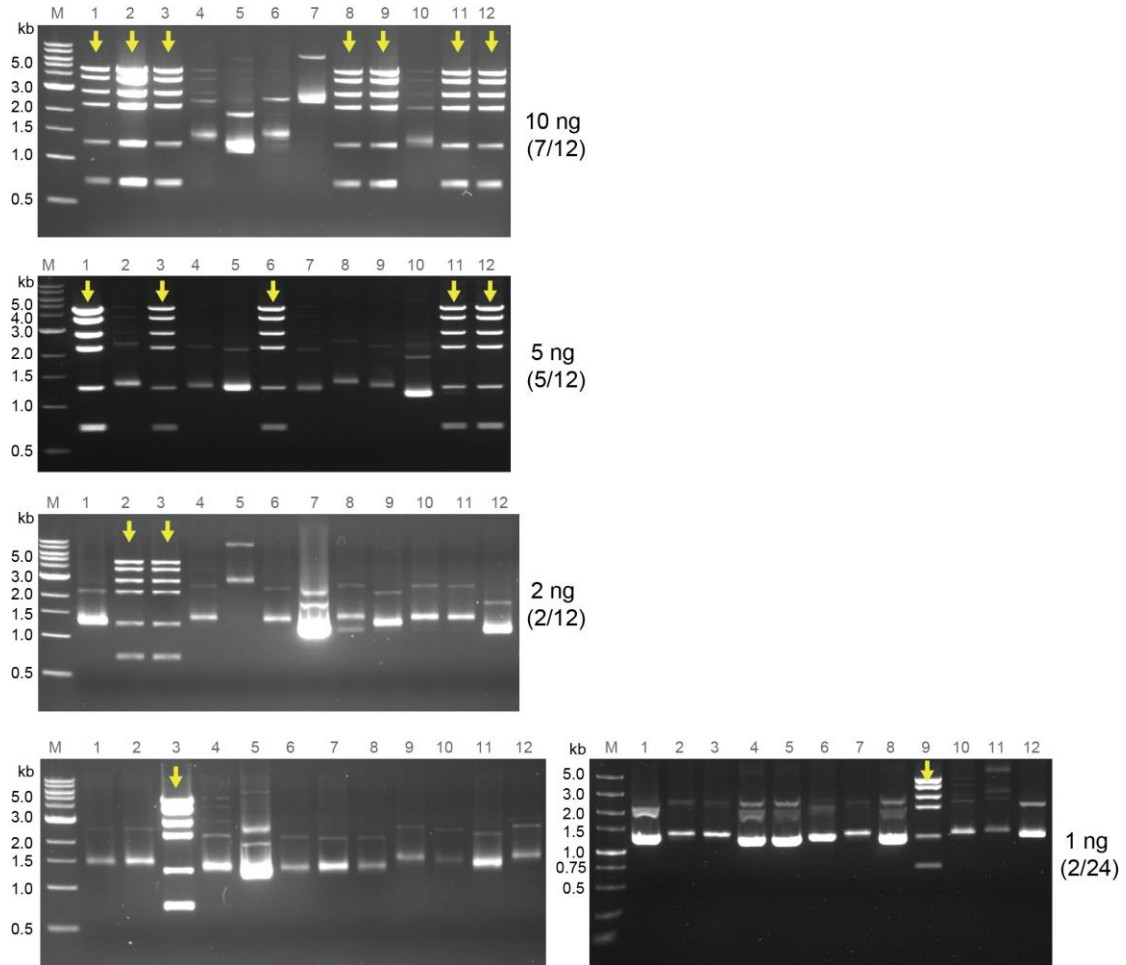

**Supplementary Figure S7. EcoRV restriction analysis of clones obtained in Table 2.**

Correct clones are indicated with arrows

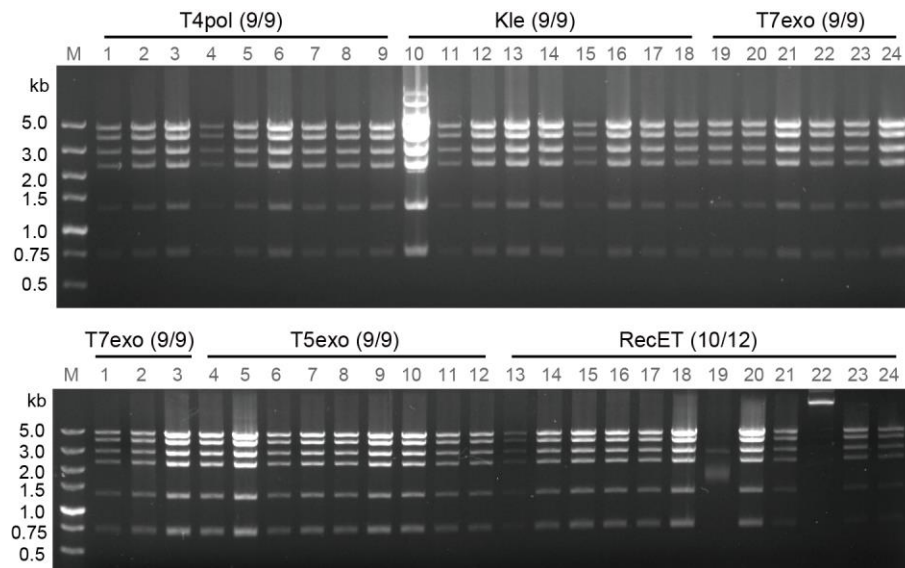

**Supplementary Figure S8. EcoRV restriction analysis of clones obtained in**

**Supplementary Figure S1A.**

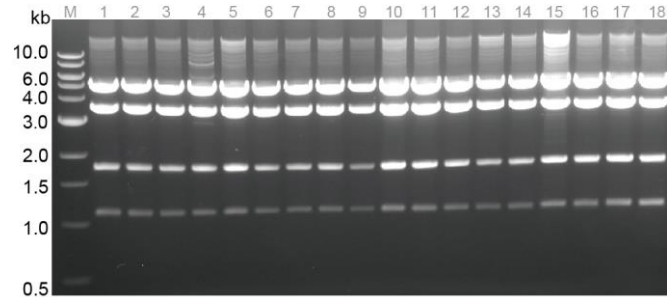

**Supplementary Figure S9. EcoRI restriction analysis of clones obtained in Supplementary Table S6.**

**Supplementary Note S1. The formula used to calculate the percentage of linear and circular products in the *in vitro* assembly reaction.**

$$\text{linear \%} = \frac{\text{c. f. u.}_{ExoCET} - \text{c. f. u.}_{T4pol}}{\text{c. f. u.}_{ExoCET}} \times 100\%$$

$$\text{circular \%} = \frac{\text{c. f. u.}_{T4pol}}{\text{c. f. u.}_{ExoCET}} \times 100\%$$

**In Figure 1F:**

$$\text{linear \%} = \frac{32,500 - 4,880}{32,500} \times 100\% = 85\%$$

$$\text{circular \%} = \frac{4,880}{32,500} \times 100\% = 15\%$$

**In Figure 2B-a:**

$$\text{linear \%} = \frac{28,233 - 3,980}{28,233} \times 100\% = 86\%$$

$$\text{circular \%} = \frac{3,980}{28,233} \times 100\% = 14\%$$

**Supplementary Table S1. Oligonucleotides for *in vitro* digestion of *S. albus* genomic DNA using Cas9-gRNA complexes**

| Name          | sequence (5'-3')                                                           |         |
|---------------|----------------------------------------------------------------------------|---------|
| sal-gRNA-A1F  | GACTGACACTGATAATACGACTCACTATAGGCCAGTCTCCGTCCGGCCTgtttAagagctaTGCTGGAAACAG  |         |
| sal-gRNA-A2F  | GACTGACACTGATAATACGACTCACTATAGGCCTTCACCAGCCGCGACAgtttAagagctaTGCTGGAAACAG  |         |
| sal-gRNA-A3F  | GACTGACACTGATAATACGACTCACTATAGGGAGCGCGAACCCTGGCTCCgtttAagagctaTGCTGGAAACAG |         |
| sal-gRNA-A4F  | GACTGACACTGATAATACGACTCACTATAGGGGCTGGCTCTGAGCCGTTgtttAagagctaTGCTGGAAACAG  |         |
| sal-gRNA-B5F  | GACTGACACTGATAATACGACTCACTATAGGGGCACCGTGGGGTTCGATAgtttAagagctaTGCTGGAAACAG |         |
| sal-gRNA-B6F  | GACTGACACTGATAATACGACTCACTATAGGCGACATCGAGGACGACTTgtttAagagctaTGCTGGAAACAG  |         |
| sal-gRNA-B7F  | GACTGACACTGATAATACGACTCACTATAGGAGTTCGCGGGCGAGGCGGgtttAagagctaTGCTGGAAACAG  |         |
| sal-gRNA-B8F  | GACTGACACTGATAATACGACTCACTATAGGTCAGATATCCGGCGAGGGgtttAagagctaTGCTGGAAACAG  |         |
| gRNA-R        | AAAAGCACCGACTCGGTGCCAC                                                     |         |
| salTARGET-A-1 | GTGATGCTGTCCGGGATCACCGAG                                                   | 1602 bp |
| salTARGET-A-2 | GCCGAGGACATCGACACGGTGATG                                                   |         |
| salTARGET-B-1 | GTGCCGCACTCATCCCCAACTG                                                     | 1500 bp |
| salTARGET-B-2 | ACTCGGTGAAGGGGAAGTGCATG                                                    |         |

The T7 promoter sequence is indicated in red. The CRISPR guide sequences are indicated in blue.

**Supplementary Table S2. Oligonucleotides for amplification of p15A-cm linear vectors.** Lowercase letters are homology arms

| Gene                          | Primer     | sequence (5'-3')                                                                                            |
|-------------------------------|------------|-------------------------------------------------------------------------------------------------------------|
| <i>lux</i>                    | lux25-1    | ttcaagtaaagcattaagatcggttGGATCCTTACGCCCCGCCCTGCCACTC                                                        |
|                               | lux25-2    | aaaatctaaatcaagtaataataaGGTACCGGTAACGAATCAGACAATTGACG                                                       |
| <i>lux</i>                    | Lux40-1    | aattccattgaacattcaagtaaagcattaagatcggttGGATCCTTACGCCCCGCCCTGCCACTC                                          |
|                               | Lux40-2    | aataatagatataaaaaatctaaatcaagtaataataaGGTACCGGTAACGAATCAGACAATTGACG                                         |
| <i>lux</i>                    | Lux80-1    | ctaaatcgagcattccatcacttgaattcatcagaccaattccattgaacattcaagtaaagcattaagatcggttGGATCCTTACGCCCCGCCCTGCCACTC     |
|                               | Lux80-2    | tattttaacgagttagtagaacgctaattccgctcagaataataatagatataaaaaatctaaatcaagtaataataaGGTACCGGTAACGAATCAGACAATTGACG |
| <i>plu2670</i>                | plu2670-1  | ctgggaaaactacggtgagcatatgtttaccacttctcagagaaccgtgaatattgctgtaaacccgatgaactgccgggTTACGCCCCGCCCTGCCACTC       |
|                               | plu2670-2  | aatccatgattaccaaccactcccaaagatattataaaatctcaacatgctgattgatcctttggaatgggctaaatctagaGGTAACGAATCAGACAATTGACG   |
| Mouse<br><i>Prkar1a</i>       | mPrkar1a-1 | agatgacgccctctccactctgcataccaattccacataaccactctcaaattataatgctcacagacccttaaggtTTACGCCCCGCCCTGCCACTC          |
|                               | mPrkar1a-2 | catagtgaccattgtatagagtacttagctatgctcagagtaatgctctgatctaggtgcttcttttacttggTTAACGAATCAGACAATTGACG             |
| Mouse<br><i>Dpy30</i>         | mDpy30-1   | ggattttataagtgaagggtgacattttagtattccttaccctgctggttctcatacgcattaactcataatccttggaccTTACGCCCCGCCCTGCCACTC      |
|                               | mDpy30-2   | tgcccttcagaagacctaggtttagtcctagcaccactgatgctaacaaccagacataatgccagttctagggatccGGTAACGAATCAGACAATTGACG        |
| Mouse<br><i>Wnt4</i>          | mWnt4-1    | gttaactcccttaacacacacacacacacatgcacacgcacatgcacacgcgactcacaccacaaaatcacacaattTTACGCCCCGCCCTGCCACTC          |
|                               | mWnt4-2    | ctgtgctcagagctttagtgccctacataaacaggacacaaactcttctacttctgattgccacatggtccattGGTAACGAATCAGACAATTGACG           |
| Mouse<br><i>Lmbr1l-Tuba1a</i> | mLT-1      | ctatgccataggaattggaggaaattaggcttactggtccattaattattccaacggatgcagtcagaatgtatattTTACGCCCCGCCCTGCCACTC          |
|                               | mLT-2      | ttagagcagacagtgtcttaaccgttgagccatctcctcagtcctggacacactgatttaagttgacattaaattGGTAACGAATCAGACAATTGACG          |
| Human<br><i>DPY30</i>         | hDpy30-1   | ccaccacgccaggctaattttagcttaataccctattacctcaggtgtgtctaaattttctttagtggaactagtTTACGCCCCGCCCTGCCACTC            |
|                               | hDpy30-2   | agttatgtcagttgctattataatgtttattattcctgaataaaaaagaatgacacctaataaacgttgactagtGGTAACGAATCAGACAATTGACG          |
| Human<br><i>IGFLR1-LIN37</i>  | hIL-1      | agtggccttagagggtcggttaaggagccaaggcctatgcaaggatgctcacacacctccatccccacttccagacacatagTTACGCCCCGCCCTGCCACTC     |
|                               | hIL-2      | gtgctgtccaagcttggtcatctggggttctgggcttaacaccaataaagaacttctgactactaagcccagtaGGTAACGAATCAGACAATTGACG           |

**Supplementary Table S2 continued. Oligonucleotides for amplification of p15A-cm linear vectors.** Lowercase letters are homology arms

| Gene                            | Primer | sequence (5'-3')                                                                                        |
|---------------------------------|--------|---------------------------------------------------------------------------------------------------------|
| Human<br><i>IGFLR1-ARHGAP33</i> | hIA-1  | acggccggcgactgctcctcagtgaggaggcgtcactcaatatccctgcagtgggcgccgccatgtgatcaaacggtaTTACGCCCCGCCCTGCCACTC     |
|                                 | hIA-2  | gtgctgtccaagcttggtcatctggggttgctgggcttaacaccaataaagaactttgctgactactaagcccagtaGGTAACGAATCAGACAATTGACG    |
| Human<br><i>ZBTB32-LIN37</i>    | hZL-1  | cctagagggtcggttaaggagccaagggcctatgcaaggatgctcacacacctccatccccacctcccagacacatatgTTACGCCCCGCCCTGCCACTC    |
|                                 | hZL-2  | aagaactagactagaagttgaaaaacaggtttcactgcatcccttcacagtgaatggcccttctcttcagcactcatatgGGTAACGAATCAGACAATTGACG |

**Supplementary Table S3. Oligonucleotides used for ExoCET genotyping**

| Name           | sequence (5'-3')                                                                                           |
|----------------|------------------------------------------------------------------------------------------------------------|
| Oct4-Venus-1   | ggtgacgagaacaggaacagactttagtcagaattaacatgatctggctggctgttcaattttcagggggacacagggtaattaaTTACGCCCCGCCCTGCCACTC |
| Oct4-Venus-2   | cgcccacaggtgtacagtagcaggcatgcacacaccacaaaaaaaaaaaaaaaaatTTTTTTTcaagttgaaacagggatGGTAACGAATCAGACAATTGACG    |
| Nanog-Cherry-1 | cttggttacatgaacagtttaagggtgaaattaacttaagttcctattgcacaattgggtctggaaccaggggcccatatgTTACGCCCCGCCCTGCCACTC     |
| Nanog-Cherry-2 | tgggtaagagcatccaacggctcagtggttaagagcaccactgctctccgaaggtctggagtcaaaccagcaaccatagGGTAACGAATCAGACAATTGACG     |
| Gata2-Venus-1  | ccatctccagcaggttcttaggtcctgtgcctatctggatctggggacattgagtcttgacaataccatacatattgtaTTACGCCCCGCCCTGCCACTC       |
| Gata2-Venus-2  | cacttttcccaaaagtcacctggagttttctccacaacacctccattctggagagacaagtgagttcagtgccgagtaGGTAACGAATCAGACAATTGACG      |
| MII4-AID-1     | cattgtagtttcttccataggccaatcctgtcagtgtaattcagtcctgtgtgtaaatgcagactgtagaaaagactactagTTACGCCCCGCCCTGCCACTC    |
| MII4-AID-2     | cgaaaatcttctaaacctgtctttattcttcttcttcttcttaactaaactctgctacttggttggaaatGGTAACGAATCAGACAATTGACG              |

Lowercase letters are homology arms.

**Supplementary Table S4. Oligonucleotides used to amplify the *mVenus-PGK-neo* cassette**

| Name            | sequence (5'-3')                                                                         |
|-----------------|------------------------------------------------------------------------------------------|
| mVenus-mDpy30-1 | tcctagcatcttatcttttaaaaaacaaggcgcagtttgaagatcgaaatGAAGTGCATACCAATCAGGAC                  |
| mVenus-mDpy30-2 | atcatgtaaatctacagtagcaaccaaattgttctctcttccaagaaaCTATTTAGTCAAGCGCTCTTGTCGTCGTCATCCTTGTAG  |
| mVenus-hDPY30-1 | ttctagcatcttatcttttaaaaaacaaggcacagtttgaagatcgaaacGAAGTGCATACCAATCAGGAC                  |
| mVenus-hDPY30-2 | atcatgtaaatctacagtagcaactaaattttctgttcttcccattaagCTATTTAGTCAAGCGCTCTTGTCGTCGTCATCCTTGTAG |

Lowercase letters are homology arms.

**Supplementary Table S5. Sequence analysis of *Wnt4* alleles cloned from the mouse melanoma B16 cell**

| Position on<br><i>Mus musculus</i> strain C57BL/6J<br>chromosome 4<br>(NC_000070.6) | 137,277,158 | Between<br>137,280,611<br>and<br>137,280,612 | 137,287,058 | Between<br>137,291,949<br>and<br>137,291,950 | Between<br>137,297,023 and<br>137,297,024 | 137,313,617 |
|-------------------------------------------------------------------------------------|-------------|----------------------------------------------|-------------|----------------------------------------------|-------------------------------------------|-------------|
| Base of NC_000070.6                                                                 | C           | -                                            | G           | -                                            | -                                         | A           |
| #31                                                                                 | G           | AGATAGATAGATAGAT                             | -           | -                                            | -                                         | C           |
| #71, #82                                                                            | C           | AGATAGATAGAT                                 | -           | AC                                           | GAAAGAAA                                  | A           |
|                                                                                     |             | intron                                       | intron      | intron                                       | exon                                      |             |

\*Location of *Wnt4* on chromosome 4: 137,277,489-137,299,726



**Supplementary Table S6. Titration of ExoCET genotyping experiment using Oct4-hVenus #7 (R1) cell line**

| 500 ng of digested genomic DNA mixed with indicated amounts of p15A-cm vectors  |                               |                    |
|---------------------------------------------------------------------------------|-------------------------------|--------------------|
| p15A-cm vectors                                                                 | c.f.u. per ml on Km+Cm plates | Correct / checked* |
| 500 ng                                                                          | 12                            | 3/3, 100%          |
| 1000 ng                                                                         | 10                            | 3/3, 100%          |
| 2000 ng                                                                         | 8                             | 3/3, 100%          |
| 1000 ng of digested genomic DNA mixed with indicated amounts of p15A-cm vectors |                               |                    |
| p15A-cm vectors                                                                 | c.f.u. per ml on Km+Cm plates | Correct / checked* |
| 500 ng                                                                          | 10                            | 3/3, 100%          |
| 1000 ng                                                                         | 10                            | 3/3, 100%          |
| 2000 ng                                                                         | 10                            | 3/3, 100%          |

\* Confirmed by restriction analysis (**Supplementary Figure S7**)

**Supplementary Table S7. Direct cloning of the 45kb segment containing the *Wnt4* gene from mouse genomic DNA using indicated methods**

|                 | T4pol+RecET | Gibson        | Gibson+RecET   |
|-----------------|-------------|---------------|----------------|
| c.f.u. (/ml)    | 76±16       | 181,000±1,000 | 257,000±17,000 |
| Correct/checked | 8/25        | 0/60          | 0/60           |

**Supplementary Table S8. Summary of previous direct DNA cloning methods**

|                                                                                                                                                                                                                                                                                | Methods                                                                                                                                                                                                                                                                                                                                                                                                                                                                                                                                                                                                                                                                                           | Features                                                                                                                                                                                     | References |
|--------------------------------------------------------------------------------------------------------------------------------------------------------------------------------------------------------------------------------------------------------------------------------|---------------------------------------------------------------------------------------------------------------------------------------------------------------------------------------------------------------------------------------------------------------------------------------------------------------------------------------------------------------------------------------------------------------------------------------------------------------------------------------------------------------------------------------------------------------------------------------------------------------------------------------------------------------------------------------------------|----------------------------------------------------------------------------------------------------------------------------------------------------------------------------------------------|------------|
| In vivo                                                                                                                                                                                                                                                                        | TAR                                                                                                                                                                                                                                                                                                                                                                                                                                                                                                                                                                                                                                                                                               | Relies on the natural homologous recombination of the yeast <i>Saccharomyces cerevisiae</i> .                                                                                                | (1-3)      |
|                                                                                                                                                                                                                                                                                | <p><b>Advantages:</b> It can directly clone very large DNA fragments from eukaryotic and prokaryotic genomes.</p> <p><b>Disadvantages:</b> 1) TAR cloning is laborious; 2) In yeast, recombination is continuously active resulting in stability problems with cloned DNAs; 3) The final recombinant DNA molecule needs to be reintroduced into <i>E. coli</i> for downstream analytical and preparative work.</p>                                                                                                                                                                                                                                                                                |                                                                                                                                                                                              |            |
|                                                                                                                                                                                                                                                                                | RecET                                                                                                                                                                                                                                                                                                                                                                                                                                                                                                                                                                                                                                                                                             | Based on the linear-linear homologous recombination mediated by the full-length RecET in <i>E. coli</i> .                                                                                    | (4)        |
|                                                                                                                                                                                                                                                                                | <p><b>Advantages:</b> 1) Simple and fast; 2) The expression of RecET recombinases in <i>E. coli</i> is tightly regulated under an inducible promoter. Thereby the potential for recombination is limited to a short window, which reduces unwanted rearrangements and enhances the stable maintenance of DNA molecules with repetitive sequences; 3) The target region is cloned in well studied and tractable hosts which facilitate the further engineering; 4) Direct cloning to establish an expression construct is possible.</p> <p><b>Disadvantages:</b> It is challenging to clone very large DNA fragments (&gt;50kb) from prokaryotic genomes or to clone DNA from complex genomes.</p> |                                                                                                                                                                                              |            |
|                                                                                                                                                                                                                                                                                | oriT                                                                                                                                                                                                                                                                                                                                                                                                                                                                                                                                                                                                                                                                                              | Integration of two directly oriented <i>oriT</i> sites flanking the target DNA region in original hosts.                                                                                     | (5)        |
|                                                                                                                                                                                                                                                                                | ΦBT1                                                                                                                                                                                                                                                                                                                                                                                                                                                                                                                                                                                                                                                                                              | Integration of mutated <i>attB</i> and <i>attP</i> sites flanking the target DNA region in original hosts.                                                                                   | (6)        |
|                                                                                                                                                                                                                                                                                | Cre                                                                                                                                                                                                                                                                                                                                                                                                                                                                                                                                                                                                                                                                                               | Integration of two loxP sites flanking the target DNA region in original hosts.                                                                                                              | (7)        |
|                                                                                                                                                                                                                                                                                | <p><b>Advantage:</b> Both methods can selectively isolate large fragments from prokaryotic genomes.</p> <p><b>Disadvantages:</b> 1) They are limited to bacteria in culture with well-developed genome engineering systems; 3) The process is laborious employing two plasmid constructions and two genome modifications followed by a final step of DNA excision and circularization by conjugation or site-specific recombination for each exercise.</p>                                                                                                                                                                                                                                        |                                                                                                                                                                                              |            |
|                                                                                                                                                                                                                                                                                | BGM vector                                                                                                                                                                                                                                                                                                                                                                                                                                                                                                                                                                                                                                                                                        | Isolated target DNA is transformed into <i>Bacillus subtilis</i> and integrated into the genome by homologous recombination using two preinstalled sequences flanking the target DNA region. | (8)        |
| <p><b>Advantage:</b> The capacity of <i>Bacillus subtilis</i> genome vector is large (&gt;3.5 Mb).</p> <p><b>Disadvantages:</b> 1) Pre-engineering of <i>Bacillus subtilis</i> genome is required; 2) The utilization of the cloned DNA in the BGM vector is inconvenient.</p> |                                                                                                                                                                                                                                                                                                                                                                                                                                                                                                                                                                                                                                                                                                   |                                                                                                                                                                                              |            |

|                 | Methods                                                                                                                                                                                   | Features                                                                                                                              | References |
|-----------------|-------------------------------------------------------------------------------------------------------------------------------------------------------------------------------------------|---------------------------------------------------------------------------------------------------------------------------------------|------------|
| <i>In vitro</i> | Gibson<br>CATCH                                                                                                                                                                           | The linear cloning vector and digested genomic fragment are specifically annealed using the <i>in vitro</i> Gibson assembly reaction. | (9,10)     |
|                 | <p><b>Advantage:</b> Gibson assembly is an easy <i>in vitro</i> reaction.</p> <p><b>Disadvantage:</b> High background from re-circularized empty vector (see Supplementary Table S7).</p> |                                                                                                                                       |            |

## Supplementary References

- Larionov, V., Kouprina, N., Graves, J., Chen, X.N., Korenberg, J.R. and Resnick, M.A. (1996) Specific cloning of human DNA as yeast artificial chromosomes by transformation-associated recombination. *Proc. Natl. Acad. Sci. U. S. A.*, **93**, 491-496.
- Kouprina, N. and Larionov, V. (2008) Selective isolation of genomic loci from complex genomes by transformation-associated recombination cloning in the yeast *Saccharomyces cerevisiae*. *Nat. Protoc.*, **3**, 371-377.
- Lee, N.C., Larionov, V. and Kouprina, N. (2015) Highly efficient CRISPR/Cas9-mediated TAR cloning of genes and chromosomal loci from complex genomes in yeast. *Nucleic Acids Res.*, **43**, e55.
- Fu, J., Bian, X., Hu, S., Wang, H., Huang, F., Seibert, P.M., Plaza, A., Xia, L., Muller, R., Stewart, A.F. *et al.* (2012) Full-length RecE enhances linear-linear homologous recombination and facilitates direct cloning for bioprospecting. *Nat. Biotechnol.*, **30**, 440-446.
- Chain, P.S., Hernandez-Lucas, I., Golding, B. and Finan, T.M. (2000) oriT-directed cloning of defined large regions from bacterial genomes: identification of the *Sinorhizobium meliloti* pExo megaplasmid replicator region. *J. Bacteriol.*, **182**, 5486-5494.
- Du, D., Wang, L., Tian, Y., Liu, H., Tan, H. and Niu, G. (2015) Genome engineering and direct cloning of antibiotic gene clusters via phage varphiBT1 integrase-mediated site-specific recombination in *Streptomyces*. *Sci. Rep.*, **5**, 8740.
- Hu, S., Liu, Z., Zhang, X., Zhang, G., Xie, Y., Ding, X., Mo, X., Stewart, A.F., Fu, J., Zhang, Y. *et al.* (2016) "Cre/loxP plus BAC": a strategy for direct cloning of large DNA fragment and its applications in *Photobacterium luminescens* and *Agrobacterium tumefaciens*. *Sci. Rep.*, **6**, 29087.
- Yonemura, I., Nakada, K., Sato, A., Hayashi, J.I., Fujita, K., Kaneko, S. and Itaya, M. (2007) Direct cloning of full-length mouse mitochondrial DNA using a *Bacillus subtilis* genome vector. *Gene*, **391**, 171-177.
- Jiang, W., Zhao, X., Gabrieli, T., Lou, C., Ebenstein, Y. and Zhu, T.F. (2015) Cas9-Assisted Targeting of CHromosome segments CATCH enables one-step targeted cloning of large gene clusters. *Nat. Commun.*, **6**, 8101.
- Zhou, Y., Murphy, A.C., Samborsky, M., Prediger, P., Dias, L.C. and Leadlay, P.F. (2015) Iterative mechanism of macrodiolide formation in the anticancer compound conglobatin. *Chem. Biol.*, **22**, 745-754.
